# Supplementary material for: Direct fabrication of NbS2 nanoflakes on carbon fibers by atomic layer deposition for ultrasensitive cardiac troponin I detection
Source: Royal Society of Chemistry journal article supplement (doi:10.1039/d2na00827k), 2023-01-01
Supplement: d2na00827k1.pdf [file d2na00827k1.pdf]

**Direct fabrication of NbS<sub>2</sub> nanoflakes on carbon fiber by atomic layer deposition  
for ultrasensitive cardiac troponin I detection**

Yazhou Huang<sup>a\*</sup>, Yunfei Zhang<sup>a</sup>, Junyan Lv<sup>a</sup>, Yinfeng Shao<sup>a</sup>, Dongfang Yang<sup>b</sup>, Yuan  
Cong<sup>c</sup>

<sup>a</sup>Industrial Center, Nanjing Institute of Technology, Nanjing 211167, People's  
Republic of China

<sup>b</sup>School of Energy and Power Engineering, Nanjing Institute of Technology, Nanjing  
211167, People's Republic of China

<sup>c</sup>School of Materials Science and Engineering, Nanjing Institute of Technology,  
Nanjing 211167, People's Republic of China

\*Corresponding author, email: huangyazhou@njit.edu.cn

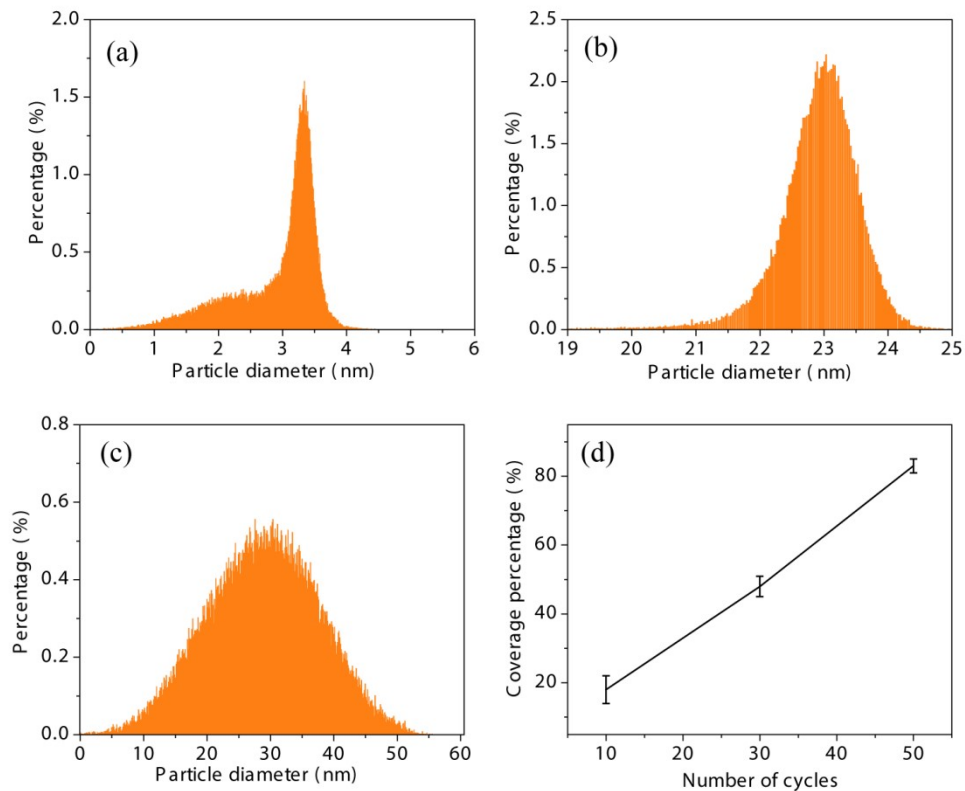

**Fig.S1.** Particle diameter distribution of ALD-made NbS<sub>2</sub> films obtained by 10 (a), 30 (b), 50 (c) cycles. (d) Coverage percentage of ALD-made NbS<sub>2</sub> films with difference cycles.

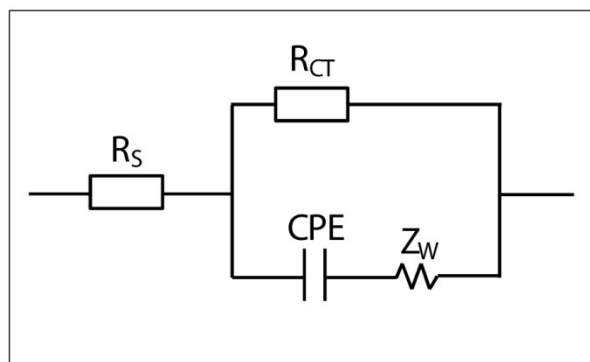

**Fig.S2.** The schematic of equivalent circuit including solution resistance ( $R_s$ ), charge transport resistance ( $R_{ct}$ ), constant-phase element (CPE), and Warburg impedance ( $Z_w$ ).

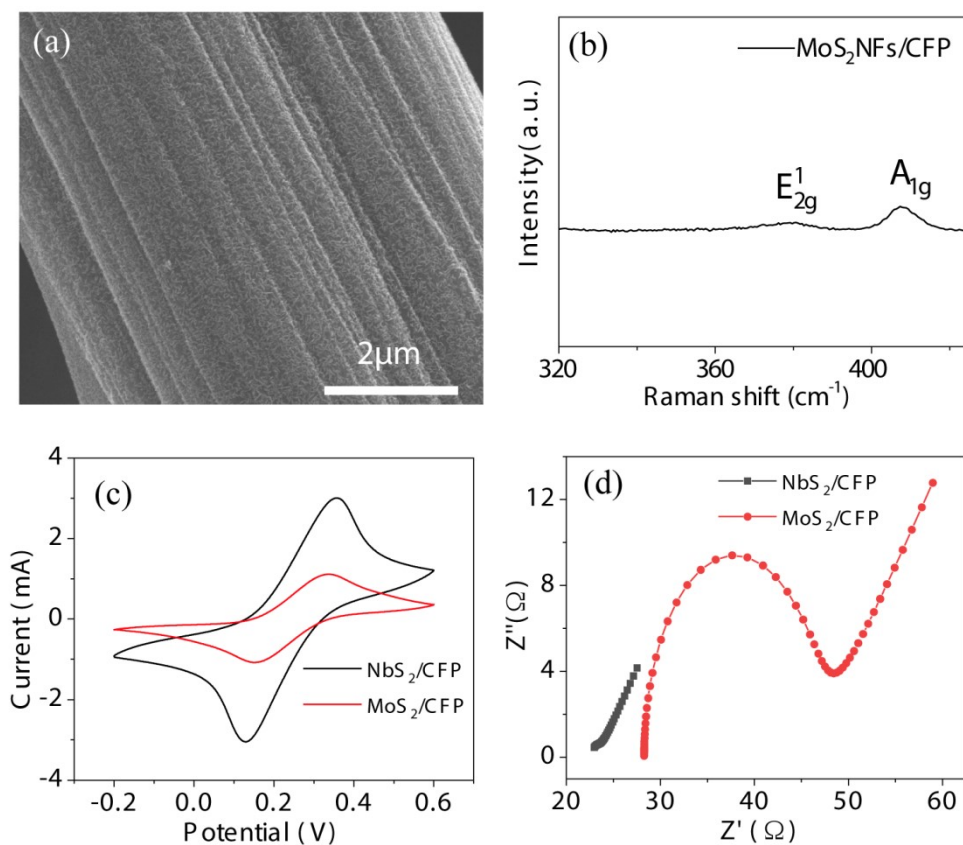

**Fig.S3.** MoS<sub>2</sub> constructed on the surface of CFP by 70 ALD cycles using MoCl<sub>5</sub> and H<sub>2</sub>S. Other growth processes are the same as that of NbS<sub>2</sub>. Results of SEM (A), Raman (B), CV (C) and EIS (D).

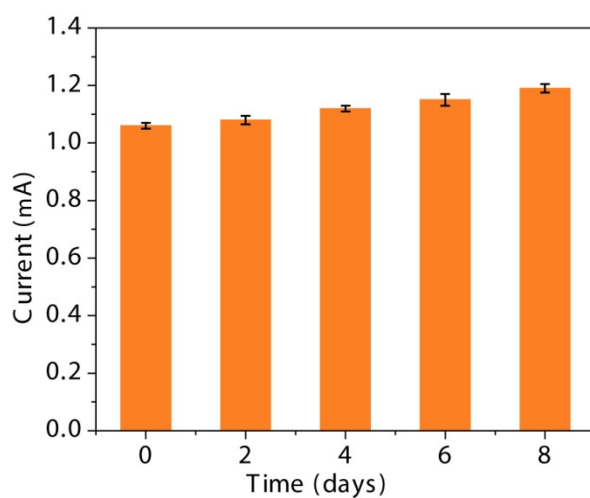

**Fig.S4.** Stability of the modified electrodes kept under 4 °C for 0-8 days (n=3).

**Table S1.** cTnI determination in human serum samples with the biosensor (n=3).

| <b>Sample</b> | <b>Added</b> | <b>Found</b> | <b>Recovery(%)</b> | <b>RSD(%)</b> |
|---------------|--------------|--------------|--------------------|---------------|
| 1             | 100 pM       | 101.61 pM    | 101.61             | 3.11          |
| 2             | 1 pM         | 0.9367 pM    | 93.67              | 4.04          |
| 3             | 10 fM        | 9.9233 fM    | 99.23              | 4.42          |
